# Supplementary material for: On the electronic structure and spectroscopic properties of a pseudo-tetrahedral cationic cobalt(ii) tetraamine complex ? ([35]adamanzane)cobalt(ii)Electronic supplementary information (ESI) available: Table S1: Cartesian coordinates of the DFT optimized geometry of the [Co([35]adz)]2+ ion. Table S2: Results of experimental and calculated infrared absorption spectra for the [Co([35]adz)]2+ ion. See http://www.rsc.org/suppdata/dt/b3/b305712g/
Source: Royal Society of Chemistry journal article supplement (doi:10.1039/b305712g), 2003-01-01
Supplement: b305712g1.pdf [file b305712g1.pdf]

**Table S1:** Cartesian coordinates of UB3LYP/TZV optimized geometry of  $[\text{Co}([\text{3}^5]\text{adz})]^{2+}$  from a Gaussian 98 Rev. A7 calculation.

| Atom | X          | Y          | Z          |
|------|------------|------------|------------|
| Co   | 0.0000000  | 0.0000000  | 0.5677699  |
| C    | 0.0000000  | 0.0000000  | -2.7099482 |
| H    | 0.2193800  | 0.8349460  | -3.3776461 |
| H    | -0.2193800 | -0.8349460 | -3.3776461 |
| C    | -1.3201250 | 0.2763170  | -1.9479581 |
| C    | 1.3201250  | -0.2763170 | -1.9479581 |
| H    | -2.0016961 | 0.7950440  | -2.6290351 |
| H    | -1.7985660 | -0.6685570 | -1.6997871 |
| H    | 2.0016961  | -0.7950440 | -2.6290351 |
| H    | 1.7985660  | 0.6685570  | -1.6997871 |
| N    | -1.2321230 | 1.0637770  | -0.6556091 |
| N    | 1.2321230  | -1.0637770 | -0.6556091 |
| C    | -0.7060450 | 2.4684291  | -0.9053922 |
| C    | 0.7060450  | -2.4684291 | -0.9053922 |
| H    | -1.5228040 | 3.0672820  | -1.3168961 |
| H    | 0.0595110  | 2.4076600  | -1.6772171 |
| H    | 1.5228040  | -3.0672820 | -1.3168961 |
| H    | -0.0595110 | -2.4076600 | -1.6772171 |
| C    | -0.1186820 | 3.1709459  | 0.3313869  |
| C    | 0.1186820  | -3.1709459 | 0.3313869  |
| H    | 0.0000000  | 4.2237992  | 0.0649279  |
| H    | -0.8254160 | 3.1695931  | 1.1658239  |
| H    | 0.0000000  | -4.2237992 | 0.0649279  |
| H    | 0.8254160  | -3.1695931 | 1.1658239  |
| C    | 1.2561740  | 2.6691511  | 0.7948349  |
| C    | -1.2561740 | -2.6691511 | 0.7948349  |
| H    | 1.7179360  | 3.4078860  | 1.4528599  |
| H    | 1.9175810  | 2.5488670  | -0.0615691 |
| H    | -1.7179360 | -3.4078860 | 1.4528599  |
| H    | -1.9175810 | -2.5488670 | -0.0615691 |
| N    | 1.1999810  | 1.3428090  | 1.5347838  |
| N    | -1.1999810 | -1.3428090 | 1.5347838  |
| H    | 0.8069960  | 1.5452650  | 2.4565378  |
| H    | -0.8069960 | -1.5452650 | 2.4565378  |
| C    | 2.5783110  | 0.7452830  | 1.7713959  |
| C    | -2.5783110 | -0.7452830 | 1.7713959  |
| H    | 3.2312651  | 1.5232350  | 2.1731328  |
| H    | 2.4684410  | -0.0148570 | 2.5471958  |
| H    | -3.2312651 | -1.5232350 | 2.1731328  |
| H    | -2.4684410 | 0.0148570  | 2.5471958  |
| C    | 3.2282550  | 0.1340650  | 0.5221459  |
| C    | -3.2282550 | -0.1340650 | 0.5221459  |
| H    | 4.2539930  | -0.1172160 | 0.8044989  |
| H    | 3.3379071  | 0.8817520  | -0.2639661 |
| H    | -4.2539930 | 0.1172160  | 0.8044989  |
| H    | -3.3379071 | -0.8817520 | -0.2639661 |
| C    | 2.6161110  | -1.1672291 | -0.0235231 |
| C    | -2.6161110 | 1.1672291  | -0.0235231 |
| H    | 2.5463841  | -1.8953249 | 0.7840999  |
| H    | 3.2912540  | -1.5886050 | -0.7739361 |
| H    | -2.5463841 | 1.8953249  | 0.7840999  |
| H    | -3.2912540 | 1.5886050  | -0.7739361 |
