# Supplementary material for: On the electronic structure and spectroscopic properties of a pseudo-tetrahedral cationic cobalt(ii) tetraamine complex ? ([35]adamanzane)cobalt(ii)Electronic supplementary information (ESI) available: Table S1: Cartesian coordinates of the DFT optimized geometry of the [Co([35]adz)]2+ ion. Table S2: Results of experimental and calculated infrared absorption spectra for the [Co([35]adz)]2+ ion. See http://www.rsc.org/suppdata/dt/b3/b305712g/
Source: Royal Society of Chemistry journal article supplement (doi:10.1039/b305712g), 2003-01-01
Supplement: b305712g2.pdf [file b305712g2.pdf]

**Table S2:** The table contains the complete set of frequency data for  $[\text{Co}([\text{3}^5\text{adz})]^{2+}$  obtained by a UB3LYP/TZV calculation using Gaussian 98 Rev. A7. Symmetry of the vibrations is indicated by the irreducible representation within the  $C_2$  point group. Tentative assignments of the FT-IR KBr pellet spectra of  $[\text{Co}([\text{3}^5\text{adz})]\text{ZnCl}_4$  and  $[\text{Co}([\text{3}^5\text{adz})](\text{PF}_6)_2$  are provided along with approximate descriptions of selected vibrations.

| No. | Sym | Frequency / $\text{cm}^{-1}$ | Red. mass / AMU | Force c. / $\text{mDyne} \times \text{\AA}^{-1}$ | IR int. / $\text{km} \times \text{mol}^{-1}$ | $[\text{Co}([\text{3}^5\text{adz})]\text{ZnCl}_4$ | $[\text{Co}([\text{3}^5\text{adz})](\text{PF}_6)_2$ | Approximate description |
|-----|-----|------------------------------|-----------------|--------------------------------------------------|----------------------------------------------|---------------------------------------------------|-----------------------------------------------------|-------------------------|
| 1   | A   | 93.79                        | 3.11            | 0.02                                             | 0.13                                         |                                                   |                                                     |                         |
| 2   | B   | 107.76                       | 2.70            | 0.02                                             | 0.06                                         |                                                   |                                                     |                         |
| 3   | A   | 108.75                       | 4.00            | 0.03                                             | 0.00                                         |                                                   |                                                     | Nsec-Co-Nsec bend       |
| 4   | B   | 133.45                       | 2.71            | 0.03                                             | 0.11                                         |                                                   |                                                     |                         |
| 5   | A   | 148.26                       | 3.74            | 0.05                                             | 0.02                                         |                                                   |                                                     |                         |
| 6   | A   | 156.67                       | 3.55            | 0.05                                             | 0.48                                         |                                                   |                                                     | Ntert-Co-Ntert bend     |
| 7   | B   | 180.29                       | 2.00            | 0.04                                             | 0.45                                         |                                                   |                                                     |                         |
| 8   | B   | 196.32                       | 6.14            | 0.14                                             | 1.84                                         |                                                   |                                                     | Nsec-Co-Ntert bend      |
| 9   | A   | 208.23                       | 2.79            | 0.07                                             | 0.08                                         |                                                   |                                                     |                         |
| 10  | B   | 232.10                       | 4.74            | 0.15                                             | 0.80                                         |                                                   |                                                     | Nsec-Co-Ntert bend      |
| 11  | A   | 248.60                       | 2.79            | 0.10                                             | 0.04                                         |                                                   |                                                     |                         |
| 12  | B   | 257.92                       | 2.76            | 0.11                                             | 0.35                                         |                                                   |                                                     |                         |
| 13  | A   | 272.75                       | 2.76            | 0.12                                             | 0.58                                         |                                                   |                                                     |                         |
| 14  | B   | 274.12                       | 3.14            | 0.14                                             | 0.94                                         |                                                   |                                                     |                         |
| 15  | A   | 285.71                       | 2.46            | 0.12                                             | 0.01                                         |                                                   |                                                     |                         |
| 16  | B   | 287.58                       | 3.07            | 0.15                                             | 2.05                                         |                                                   |                                                     |                         |
| 17  | B   | 298.23                       | 2.20            | 0.12                                             | 1.47                                         |                                                   |                                                     |                         |
| 18  | B   | 311.47                       | 2.45            | 0.14                                             | 0.80                                         |                                                   |                                                     |                         |
| 19  | A   | 314.96                       | 2.72            | 0.16                                             | 0.64                                         |                                                   |                                                     |                         |
| 20  | A   | 338.54                       | 2.31            | 0.16                                             | 0.04                                         |                                                   |                                                     |                         |
| 21  | A   | 381.70                       | 1.89            | 0.16                                             | 0.19                                         |                                                   |                                                     |                         |
| 22  | B   | 387.21                       | 2.35            | 0.21                                             | 1.10                                         | 373                                               | 376                                                 | Ntert-Co-Ntert stretch  |
| 23  | B   | 402.52                       | 2.39            | 0.23                                             | 1.51                                         | 396                                               | 401                                                 | Nsec-Co-Nsec stretch    |
| 24  | A   | 422.54                       | 2.99            | 0.31                                             | 0.08                                         | 419                                               | 417                                                 |                         |
| 25  | B   | 462.32                       | 3.55            | 0.45                                             | 5.79                                         | 468                                               | 467                                                 | N-Co-N stretch          |
| 26  | B   | 472.25                       | 3.14            | 0.41                                             | 1.16                                         |                                                   |                                                     | N-Co-N stretch          |
| 27  | A   | 472.71                       | 3.65            | 0.48                                             | 0.15                                         |                                                   |                                                     |                         |
| 28  | A   | 479.39                       | 2.48            | 0.34                                             | 6.55                                         |                                                   | 484                                                 |                         |
| 29  | A   | 491.59                       | 2.32            | 0.33                                             | 2.00                                         |                                                   |                                                     |                         |
| 30  | B   | 493.54                       | 2.83            | 0.41                                             | 4.71                                         | 498                                               |                                                     | N-Co-N stretch          |
| 31  | B   | 511.52                       | 2.19            | 0.34                                             | 7.52                                         | 517                                               | 515                                                 |                         |
| 32  | B   | 537.98                       | 2.05            | 0.35                                             | 7.65                                         | 548                                               |                                                     |                         |
| 33  | A   | 541.46                       | 2.06            | 0.36                                             | 0.39                                         |                                                   |                                                     |                         |
| 34  | A   | 634.82                       | 3.72            | 0.88                                             | 4.25                                         | 635                                               | 632                                                 |                         |
| 35  | B   | 709.72                       | 1.84            | 0.55                                             | 22.69                                        | 720                                               | 716                                                 |                         |
| 36  | A   | 735.04                       | 2.45            | 0.78                                             | 2.52                                         | 745                                               | 740                                                 |                         |
| 37  | B   | 772.99                       | 2.75            | 0.97                                             | 19.54                                        | 781                                               |                                                     |                         |
| 38  | A   | 789.76                       | 2.85            | 1.05                                             | 4.31                                         |                                                   |                                                     |                         |
| 39  | A   | 801.44                       | 2.37            | 0.90                                             | 2.02                                         |                                                   |                                                     |                         |
| 40  | B   | 806.04                       | 1.84            | 0.70                                             | 2.57                                         |                                                   |                                                     |                         |
| 41  | B   | 850.96                       | 2.45            | 1.04                                             | 15.84                                        | 843                                               |                                                     |                         |
| 42  | A   | 854.22                       | 3.31            | 1.42                                             | 0.53                                         |                                                   |                                                     |                         |
| 43  | B   | 858.74                       | 2.57            | 1.12                                             | 19.84                                        | 857                                               |                                                     |                         |
| 44  | B   | 892.20                       | 1.66            | 0.78                                             | 0.22                                         |                                                   |                                                     |                         |
| 45  | A   | 897.61                       | 2.55            | 1.21                                             | 0.20                                         |                                                   |                                                     |                         |
| 46  | A   | 911.08                       | 1.64            | 0.80                                             | 2.87                                         |                                                   |                                                     |                         |
| 47  | B   | 911.90                       | 1.83            | 0.90                                             | 22.62                                        | 903                                               |                                                     |                         |
| 48  | A   | 927.20                       | 1.67            | 0.85                                             | 0.00                                         |                                                   |                                                     |                         |
| 49  | B   | 928.14                       | 2.36            | 1.20                                             | 3.05                                         |                                                   |                                                     |                         |
| 50  | A   | 939.30                       | 2.34            | 1.22                                             | 0.70                                         |                                                   |                                                     |                         |
| 51  | A   | 945.27                       | 2.61            | 1.37                                             | 0.78                                         |                                                   |                                                     |                         |
| 52  | B   | 971.78                       | 2.30            | 1.28                                             | 49.22                                        | 941                                               |                                                     |                         |
| 53  | B   | 981.49                       | 2.67            | 1.51                                             | 35.41                                        | 956                                               | 956                                                 |                         |
| 54  | A   | 981.80                       | 2.20            | 1.25                                             | 9.21                                         | 973                                               | 972                                                 |                         |
| 55  | B   | 1017.05                      | 2.43            | 1.48                                             | 77.07                                        | 1020                                              | 1018                                                |                         |
| 56  | B   | 1029.01                      | 2.37            | 1.48                                             | 26.55                                        | 1047                                              | 1043                                                |                         |
| 57  | A   | 1034.06                      | 2.76            | 1.74                                             | 14.82                                        |                                                   |                                                     |                         |
| 58  | A   | 1038.26                      | 3.07            | 1.95                                             | 0.27                                         |                                                   |                                                     |                         |
| 59  | A   | 1057.69                      | 2.45            | 1.61                                             | 10.19                                        | 1059                                              | 1058                                                |                         |
| 60  | B   | 1074.18                      | 2.40            | 1.63                                             | 22.62                                        | 1071                                              | 1066                                                |                         |
| 61  | A   | 1080.94                      | 1.92            | 1.32                                             | 6.94                                         |                                                   |                                                     |                         |
| 62  | B   | 1088.36                      | 2.75            | 1.92                                             | 3.29                                         |                                                   |                                                     |                         |
| 63  | B   | 1097.72                      | 2.39            | 1.69                                             | 35.59                                        | 1089                                              | 1089                                                |                         |
| 64  | A   | 1099.13                      | 1.92            | 1.37                                             | 0.24                                         |                                                   |                                                     |                         |
| 65  | A   | 1103.58                      | 3.11            | 2.23                                             | 0.05                                         |                                                   |                                                     |                         |
| 66  | B   | 1114.24                      | 2.24            | 1.64                                             | 15.14                                        |                                                   |                                                     |                         |
| 67  | B   | 1128.45                      | 2.35            | 1.76                                             | 1.36                                         |                                                   |                                                     |                         |
| 68  | A   | 1154.25                      | 2.16            | 1.70                                             | 1.28                                         |                                                   |                                                     |                         |
| 69  | B   | 1161.51                      | 1.89            | 1.50                                             | 40.41                                        | 1144                                              | 1140                                                |                         |
| 70  | B   | 1184.50                      | 1.89            | 1.56                                             | 1.63                                         | 1163                                              | 1166                                                |                         |

| No. | Sym | Frequency<br>/ cm <sup>-1</sup> | Red. mass<br>/ AMU | Force c./<br>mDyne × Å <sup>-1</sup> | IR int. /<br>km × mol <sup>-1</sup> | [Co([3 <sup>3</sup> ]adz)]<br>ZnCl | [Co([3 <sup>3</sup> ]adz)]<br>(PF <sub>6</sub> ) <sub>2</sub> | Approximate<br>description              |
|-----|-----|---------------------------------|--------------------|--------------------------------------|-------------------------------------|------------------------------------|---------------------------------------------------------------|-----------------------------------------|
| 71  | A   | 1200.28                         | 1.81               | 1.53                                 | 12.22                               | 1184                               | 1177                                                          |                                         |
| 72  | A   | 1232.71                         | 1.08               | 0.97                                 | 1.38                                |                                    |                                                               |                                         |
| 73  | B   | 1254.14                         | 1.23               | 1.14                                 | 11.03                               | 1222                               | 1221                                                          |                                         |
| 74  | B   | 1275.49                         | 1.15               | 1.10                                 | 9.77                                | 1244                               | 1240                                                          |                                         |
| 75  | A   | 1281.16                         | 1.13               | 1.09                                 | 1.17                                |                                    |                                                               |                                         |
| 76  | B   | 1297.40                         | 1.20               | 1.19                                 | 2.32                                |                                    |                                                               |                                         |
| 77  | A   | 1299.09                         | 1.18               | 1.17                                 | 0.01                                |                                    |                                                               |                                         |
| 78  | B   | 1309.41                         | 1.15               | 1.16                                 | 8.67                                |                                    |                                                               |                                         |
| 79  | A   | 1312.86                         | 1.19               | 1.20                                 | 0.04                                |                                    |                                                               |                                         |
| 80  | B   | 1318.62                         | 1.14               | 1.17                                 | 8.80                                |                                    |                                                               |                                         |
| 81  | A   | 1328.12                         | 1.13               | 1.17                                 | 9.21                                | 1257                               | 1256                                                          |                                         |
| 82  | A   | 1335.88                         | 1.15               | 1.21                                 | 5.04                                | 1277                               | 1273                                                          |                                         |
| 83  | B   | 1348.46                         | 1.15               | 1.23                                 | 12.23                               | 1288                               | 1288                                                          | CH <sub>2</sub> rocking                 |
| 84  | A   | 1349.34                         | 1.15               | 1.24                                 | 8.24                                | 1312                               | 1311                                                          |                                         |
| 85  | A   | 1356.68                         | 1.12               | 1.22                                 | 8.84                                | 1322                               | 1320                                                          |                                         |
| 86  | B   | 1358.82                         | 1.14               | 1.24                                 | 14.91                               | 1357                               | 1354                                                          |                                         |
| 87  | B   | 1404.17                         | 1.30               | 1.51                                 | 0.46                                |                                    |                                                               |                                         |
| 88  | A   | 1405.08                         | 1.39               | 1.61                                 | 0.17                                |                                    |                                                               |                                         |
| 89  | A   | 1410.63                         | 1.27               | 1.48                                 | 0.04                                |                                    |                                                               |                                         |
| 90  | B   | 1410.79                         | 1.36               | 1.59                                 | 3.90                                |                                    |                                                               |                                         |
| 91  | B   | 1411.85                         | 1.25               | 1.47                                 | 1.00                                | 1373                               | 1372                                                          | C-C-H bending + N-H                     |
| 92  | B   | 1418.42                         | 1.23               | 1.46                                 | 8.94                                | 1382                               | 1383                                                          | bending                                 |
| 93  | B   | 1419.73                         | 1.24               | 1.48                                 | 4.56                                | 1393                               | 1393                                                          |                                         |
| 94  | A   | 1420.42                         | 1.24               | 1.47                                 | 2.62                                |                                    |                                                               |                                         |
| 95  | A   | 1423.46                         | 1.25               | 1.49                                 | 0.01                                |                                    |                                                               |                                         |
| 96  | B   | 1423.88                         | 1.24               | 1.48                                 | 1.15                                |                                    |                                                               |                                         |
| 97  | A   | 1425.77                         | 1.24               | 1.48                                 | 0.25                                |                                    |                                                               |                                         |
| 98  | B   | 1428.60                         | 1.29               | 1.55                                 | 1.22                                |                                    |                                                               |                                         |
| 99  | A   | 1435.36                         | 1.26               | 1.53                                 | 1.13                                |                                    |                                                               |                                         |
| 100 | B   | 1441.65                         | 1.29               | 1.58                                 | 0.16                                |                                    |                                                               |                                         |
| 101 | A   | 1444.46                         | 1.28               | 1.57                                 | 0.01                                |                                    |                                                               |                                         |
| 102 | B   | 1479.72                         | 1.24               | 1.60                                 | 16.97                               | 1425                               | 1431                                                          | H-C-H angle scissoring<br>+ N-H bending |
| 103 | A   | 1480.92                         | 1.23               | 1.59                                 | 3.77                                |                                    |                                                               |                                         |
| 104 | A   | 1516.21                         | 1.08               | 1.47                                 | 10.92                               |                                    |                                                               |                                         |
| 105 | B   | 1517.13                         | 1.08               | 1.47                                 | 9.26                                | 1441                               | 1448                                                          | H-C-H angle scissoring                  |
| 106 | B   | 1518.63                         | 1.08               | 1.47                                 | 24.80                               |                                    |                                                               |                                         |
| 107 | A   | 1520.64                         | 1.09               | 1.48                                 | 0.99                                |                                    |                                                               |                                         |
| 108 | B   | 1528.59                         | 1.08               | 1.49                                 | 27.52                               |                                    |                                                               |                                         |
| 109 | A   | 1528.74                         | 1.08               | 1.49                                 | 11.79                               | 1457                               |                                                               | H-C-H angle scissoring                  |
| 110 | B   | 1531.09                         | 1.08               | 1.49                                 | 12.98                               |                                    |                                                               |                                         |
| 111 | A   | 1531.79                         | 1.08               | 1.49                                 | 8.86                                |                                    |                                                               |                                         |
| 112 | A   | 1535.92                         | 1.08               | 1.50                                 | 7.12                                |                                    |                                                               |                                         |
| 113 | A   | 1536.97                         | 1.08               | 1.50                                 | 26.91                               |                                    |                                                               |                                         |
| 114 | B   | 1537.08                         | 1.08               | 1.51                                 | 8.55                                | 1465                               | 1468                                                          | H-C-H angle scissoring                  |
| 115 | B   | 1537.48                         | 1.08               | 1.50                                 | 11.79                               |                                    |                                                               |                                         |
| 116 | A   | 1545.93                         | 1.07               | 1.51                                 | 0.43                                |                                    |                                                               |                                         |
| 117 | B   | 1551.15                         | 1.08               | 1.53                                 | 60.01                               |                                    |                                                               |                                         |
| 118 | A   | 1553.26                         | 1.08               | 1.54                                 | 36.91                               | 1480                               | 1481                                                          | H-C-H angle scissoring                  |
| 119 | A   | 3008.32                         | 1.07               | 5.70                                 | 1.93                                |                                    |                                                               |                                         |
| 120 | B   | 3009.66                         | 1.07               | 5.70                                 | 7.97                                |                                    |                                                               |                                         |
| 121 | A   | 3010.44                         | 1.07               | 5.69                                 | 0.41                                |                                    |                                                               |                                         |
| 122 | B   | 3010.60                         | 1.07               | 5.69                                 | 26.93                               |                                    |                                                               |                                         |
| 123 | B   | 3016.56                         | 1.07               | 5.72                                 | 5.72                                |                                    |                                                               |                                         |
| 124 | A   | 3016.68                         | 1.07               | 5.72                                 | 17.15                               | 2879                               | 2886                                                          | Sym C-H stretch                         |
| 125 | B   | 3018.76                         | 1.06               | 5.69                                 | 3.74                                |                                    |                                                               |                                         |
| 126 | A   | 3018.77                         | 1.06               | 5.69                                 | 20.92                               |                                    |                                                               |                                         |
| 127 | B   | 3023.27                         | 1.07               | 5.74                                 | 21.14                               |                                    |                                                               |                                         |
| 128 | A   | 3023.36                         | 1.07               | 5.74                                 | 0.16                                |                                    |                                                               |                                         |
| 129 | A   | 3030.68                         | 1.06               | 5.76                                 | 1.63                                |                                    |                                                               |                                         |
| 130 | B   | 3031.00                         | 1.06               | 5.76                                 | 8.02                                |                                    |                                                               |                                         |
| 131 | B   | 3035.93                         | 1.07               | 5.78                                 | 4.79                                |                                    |                                                               |                                         |
| 132 | A   | 3036.18                         | 1.06               | 5.78                                 | 0.15                                |                                    |                                                               |                                         |
| 133 | A   | 3037.85                         | 1.06               | 5.78                                 | 7.11                                |                                    |                                                               |                                         |
| 134 | B   | 3054.66                         | 1.10               | 6.04                                 | 1.25                                |                                    |                                                               |                                         |
| 135 | A   | 3057.32                         | 1.10               | 6.06                                 | 1.12                                |                                    |                                                               |                                         |
| 136 | B   | 3058.02                         | 1.10               | 6.06                                 | 6.15                                |                                    |                                                               |                                         |
| 137 | A   | 3059.47                         | 1.10               | 6.04                                 | 0.31                                |                                    |                                                               |                                         |
| 138 | B   | 3059.53                         | 1.10               | 6.05                                 | 3.05                                |                                    |                                                               |                                         |
| 139 | A   | 3066.84                         | 1.10               | 6.12                                 | 0.19                                |                                    |                                                               |                                         |
| 140 | B   | 3066.92                         | 1.10               | 6.11                                 | 8.59                                |                                    |                                                               |                                         |
| 141 | A   | 3079.38                         | 1.10               | 6.13                                 | 19.92                               |                                    |                                                               |                                         |
| 142 | B   | 3080.02                         | 1.10               | 6.14                                 | 4.99                                |                                    |                                                               |                                         |
| 143 | A   | 3084.34                         | 1.10               | 6.15                                 | 2.33                                |                                    |                                                               |                                         |
| 144 | A   | 3087.17                         | 1.10               | 6.16                                 | 0.21                                |                                    | 2944                                                          |                                         |
| 145 | B   | 3087.46                         | 1.10               | 6.17                                 | 4.32                                | 2926                               | 3068                                                          | Assym C-H stretch                       |
| 146 | B   | 3089.17                         | 1.10               | 6.17                                 | 30.35                               |                                    |                                                               |                                         |
| 147 | A   | 3095.89                         | 1.10               | 6.19                                 | 29.65                               |                                    |                                                               |                                         |
| 148 | B   | 3097.64                         | 1.10               | 6.19                                 | 28.47                               |                                    |                                                               |                                         |
| 149 | A   | 3403.26                         | 1.07               | 7.33                                 | 21.56                               | 3137                               |                                                               | Sym N-H stretch                         |
| 150 | B   | 3403.48                         | 1.07               | 7.33                                 | 1.96                                | 3236                               | 3276                                                          | Assym N-H stretch                       |
